# Supplementary material
Source: Springer Nature journal article supplement (https://www.springermedizin.de/resource/supplementary/12875_2013_1172_MOESM1_ESM.pdf/9436042)

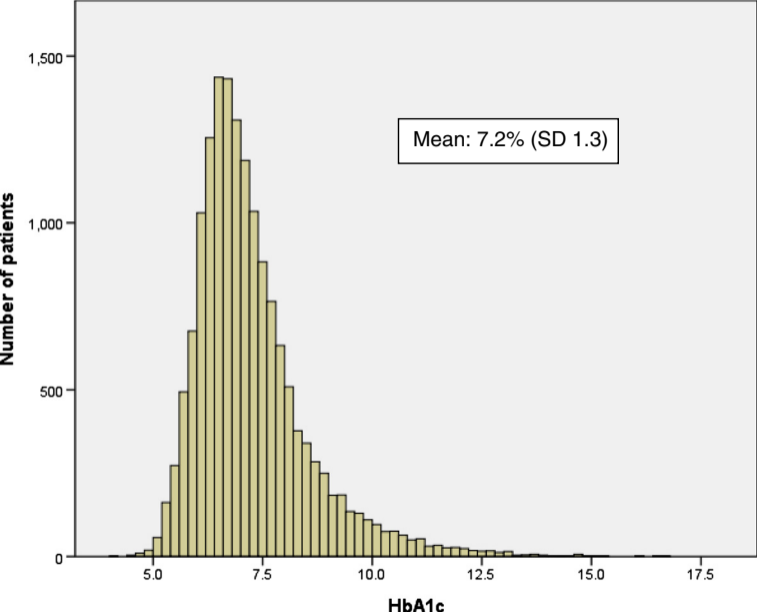

Supplement: MOESM1 [file 9436042]
